# Supplementary material for: Activity and Thermal Stability of Cobalt(II)-Based Olefin Polymerization Catalysts Adorned with Sterically Hindered Dibenzocycloheptyl Groups
Source: Molecules. 2019 May 25;24(10):2007. doi: 10.3390/molecules24102007 (PMC6572594; doi:10.3390/molecules24102007)
Supplement: Supplementary file 1 [file molecules-24-02007-s001.pdf]

Supporting information

for

# Activity and Thermal Stability of Cobalt(II)-Based Olefin Polymerization Catalysts Adorned with Sterically Hindered Dibenzocycloheptyl Groups

Muhammad Zada,<sup>1,2</sup> Liwei Guo,<sup>1,3</sup> Yanping Ma,<sup>1</sup> Wenjuan Zhang,<sup>3,\*</sup> Zygmunt Flisak,<sup>1,4,\*</sup> Yang Sun,<sup>1</sup> Wen-Hua Sun<sup>1,2,\*</sup>

<sup>1</sup> Key Laboratory of Engineering Plastics and Beijing National Laboratory for Molecular Science, Institute of Chemistry, Chinese Academy of Sciences, Beijing 100190, China. mzada17@iccas.ac.cn (M.Z.); mrliwei\_guo@163.com (L.G.); myanping@iccas.ac.cn (Y.M.); sy0471103@iccas.ac.cn (Y.S.)

<sup>2</sup> CAS Research/Education Center for Excellence in Molecular Sciences, University of Chinese Academy of Sciences, Beijing 100049, China.

<sup>3</sup> Beijing Key Laboratory of Clothing Materials R&D and Assessment, Beijing Engineering Research Center of Textile Nanofiber, School of Materials Science and Engineering, Beijing Institute of Fashion Technology, Beijing 100029, China. zhangwj@bift.edu.cn (W.Z.)

<sup>4</sup> Faculty of Chemistry, University of Opole, Oleska 48, 45-052 Opole, Poland. zgf@uni.opole.pl (Z.F.)

\* Correspondence: [zhangwj@bift.edu.cn](mailto:zhangwj@bift.edu.cn) (W.Z.); [zgf@uni.opole.pl](mailto:zgf@uni.opole.pl) (Z.F.); [whsun@iccas.ac.cn](mailto:whsun@iccas.ac.cn) (W.-H.S.); Tel.: +86-10-6255-7955 (W.-H.S.)

| Table of Contents                                                                                                                                                                                | Page |
|--------------------------------------------------------------------------------------------------------------------------------------------------------------------------------------------------|------|
| 1. The <sup>1</sup> H NMR spectra of precatalysts ( <b>Co1</b> – <b>Co5</b> )                                                                                                                    | S2   |
| 2. GPC curves of the obtained polyethylene ( <b>a</b> ); activity and $M_w$ as a function of reaction temperature, Al/Co ratio and run time ( <b>b</b> ) for the <b>Co1</b> /MMAO system         | S4   |
| 3. GPC curves of the obtained polyethylene ( <b>a</b> ); activity and $M_w$ for different precatalysts ( <b>b</b> ) at the optimized reaction conditions with MMAO as cocatalyst                 | S6   |
| 4. GPC curves of the obtained polyethylene ( <b>a</b> ); activity and $M_w$ as a function of ethylene pressure ( <b>b</b> ) at the optimized reaction conditions for the <b>Co1</b> /MMAO system | S6   |
| 5. The <sup>1</sup> H and <sup>13</sup> C NMR spectra of the polyethylene obtained with <b>Co1</b> /MMAO                                                                                         | S7   |
| 6. The selected bond lengths (Å) and angles (°) for the <i>B</i> molecules of <b>Co3</b> and <b>Co4</b>                                                                                          | S8   |

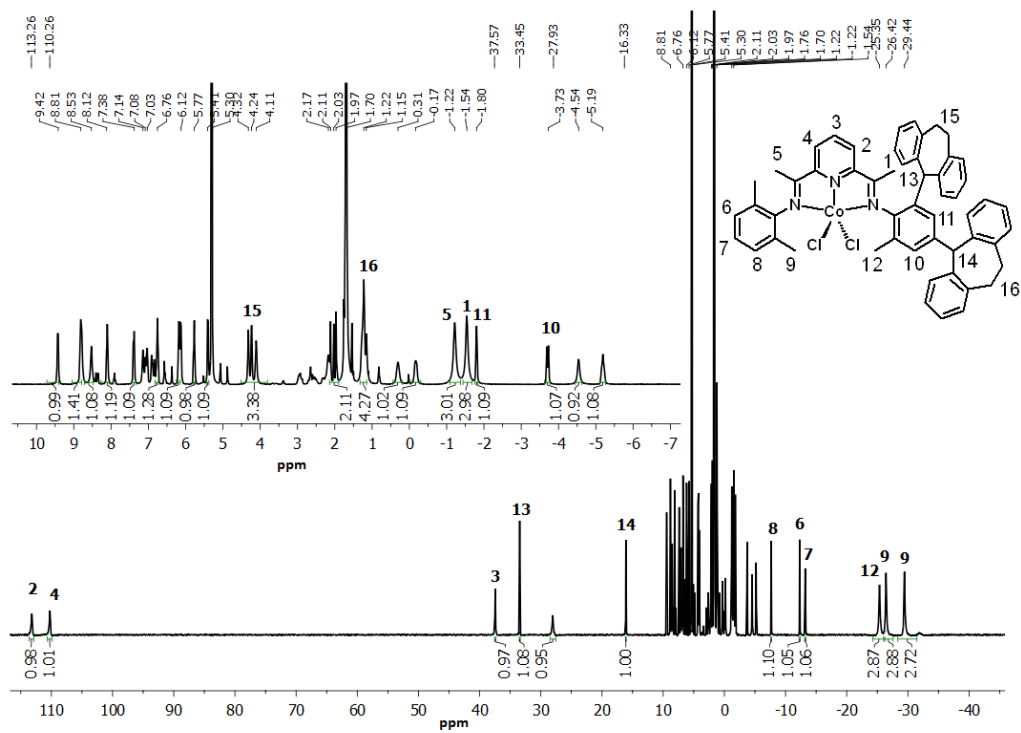

**Figure S1** <sup>1</sup>H NMR spectrum of **Co1** in CD<sub>2</sub>Cl<sub>2</sub> at room temperature.

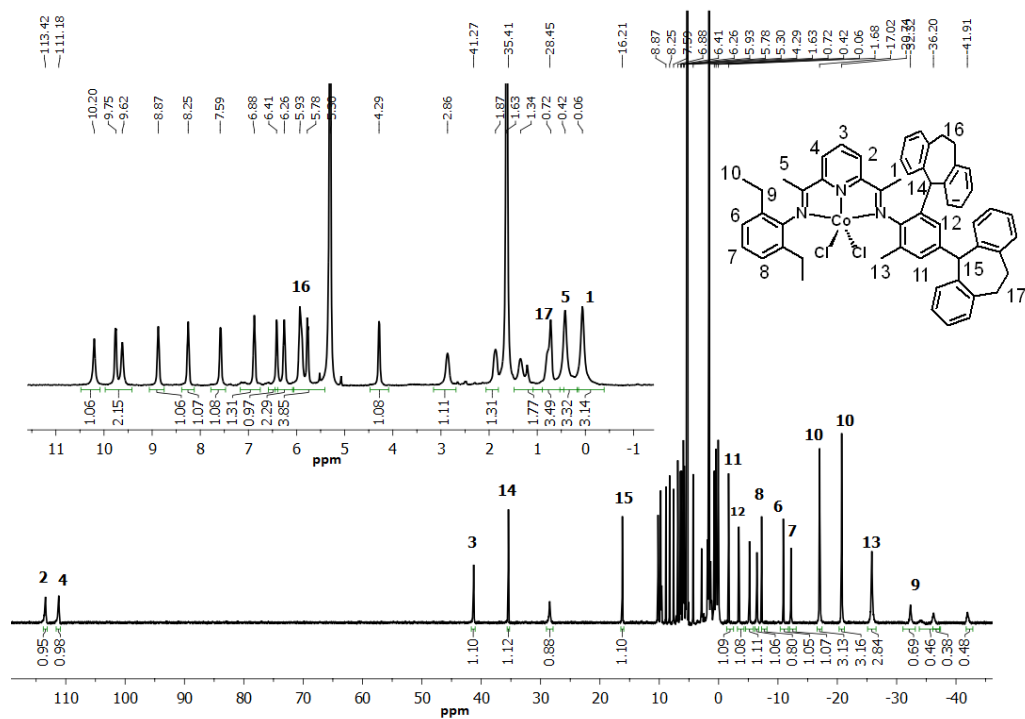

**Figure S2** <sup>1</sup>H NMR spectrum of **Co2** in CD<sub>2</sub>Cl<sub>2</sub> at room temperature.

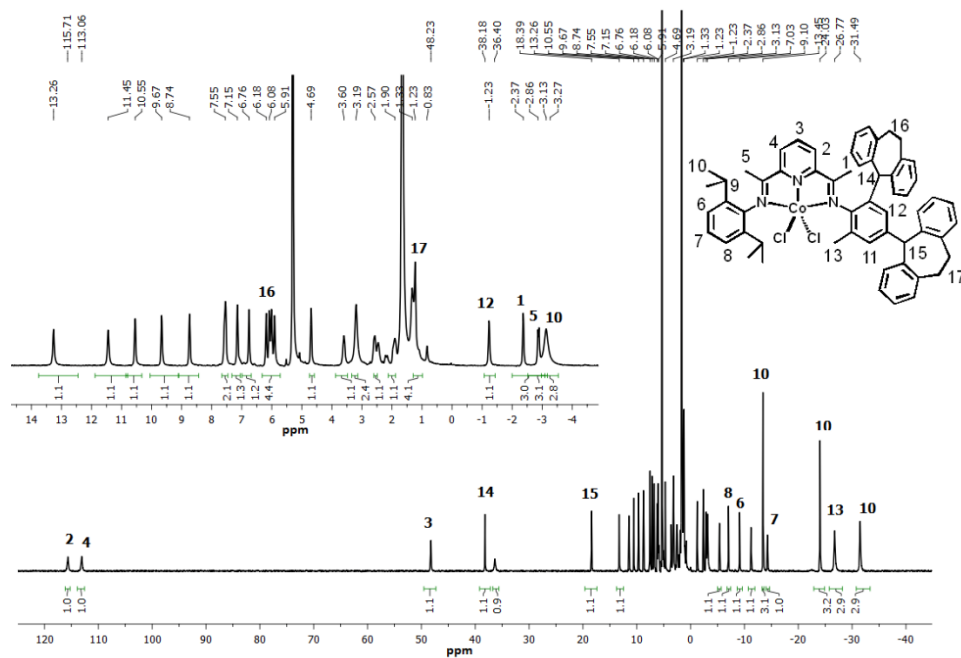

Figure S3  $^1\text{H}$  NMR spectrum of **Co3** in  $\text{CD}_2\text{Cl}_2$  at room temperature.

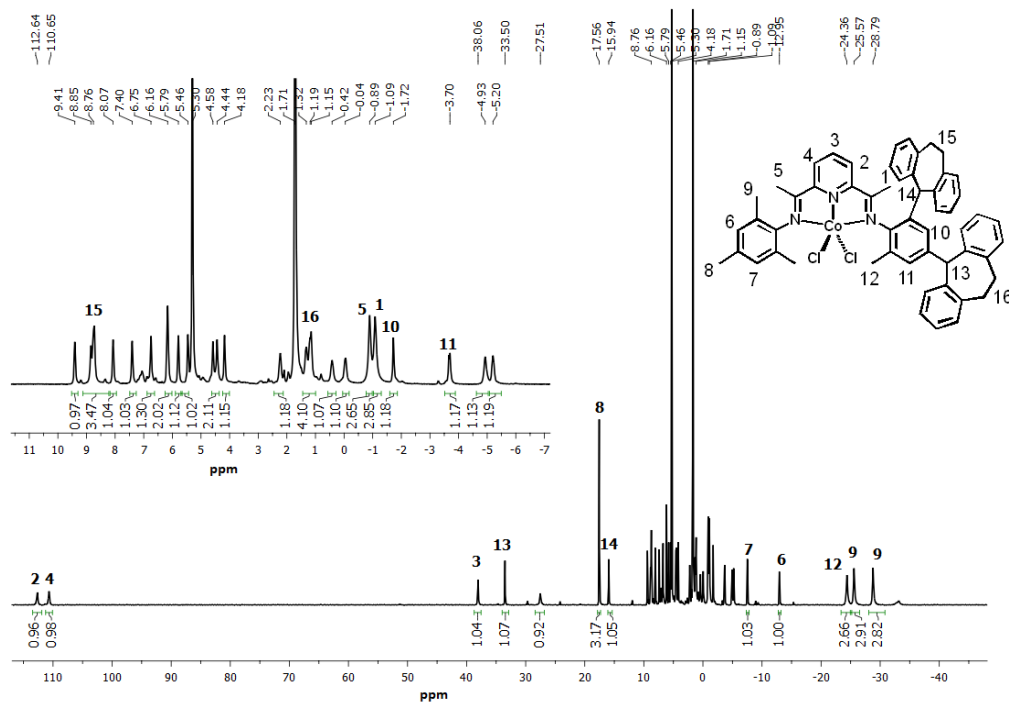

Figure S4  $^1\text{H}$  NMR spectrum of **Co4** in  $\text{CD}_2\text{Cl}_2$  at room temperature.

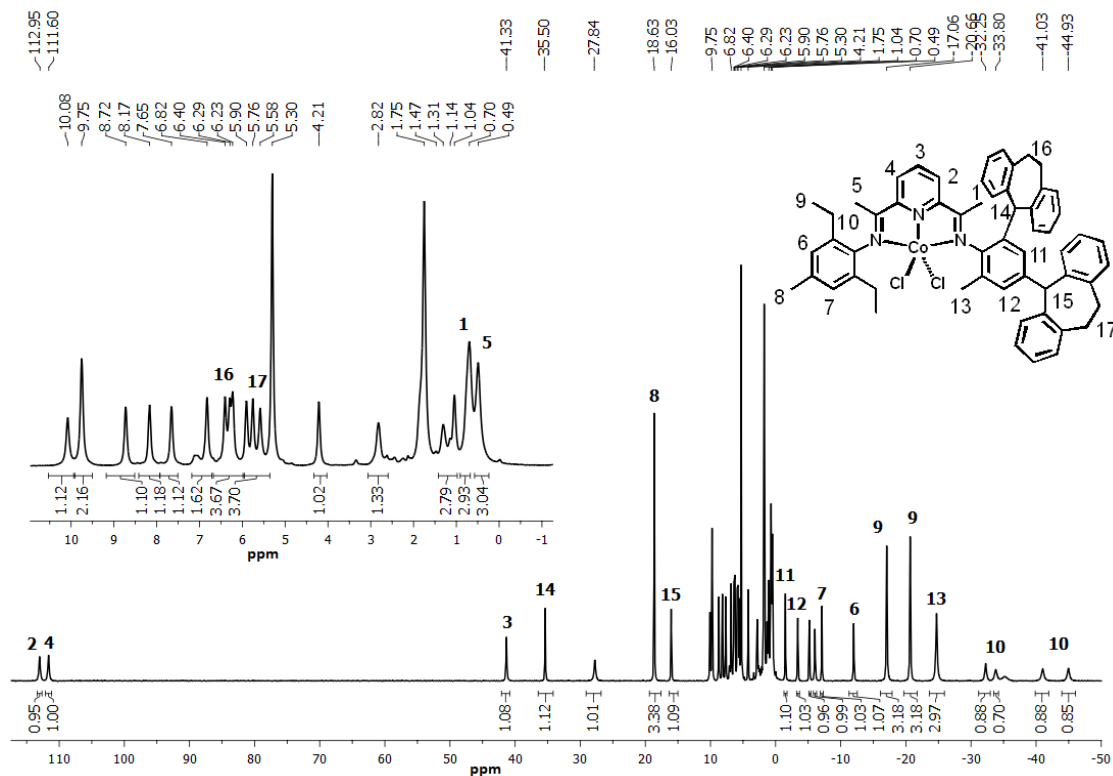

**Figure S5**  $^1\text{H}$  NMR spectrum of **Co5** in  $\text{CD}_2\text{Cl}_2$  at room temperature.

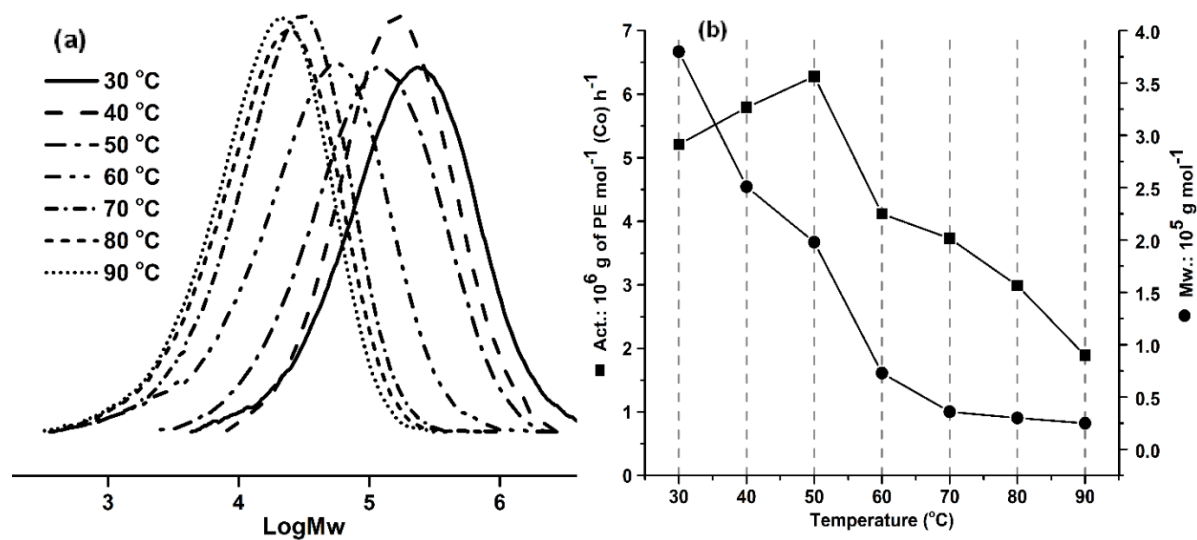

**Figure S6** GPC curves of the obtained polyethylene (a); activity and  $M_w$  as a function of reaction temperature (b) for the **Co1**/MMAO system (Table 5, entries 1 – 7).

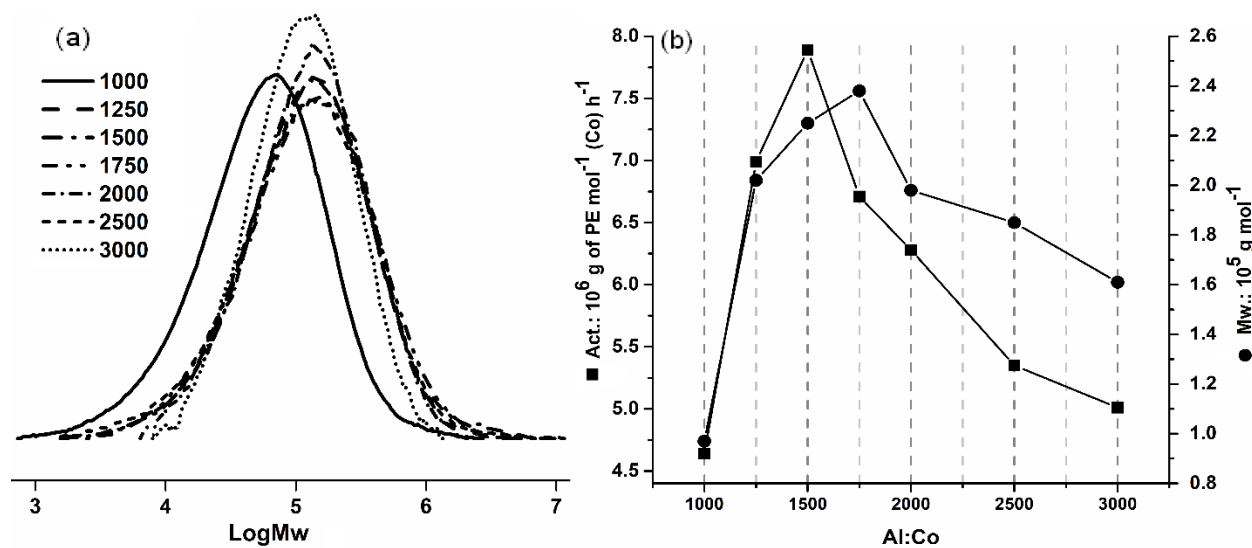

**Figure S7** GPC curves of the obtained polyethylene (a); activity and  $M_w$  as a function of Al/Co ratio (b) for the **Co1**/MMAO system (Table 5, entries 3 and 8 – 13).

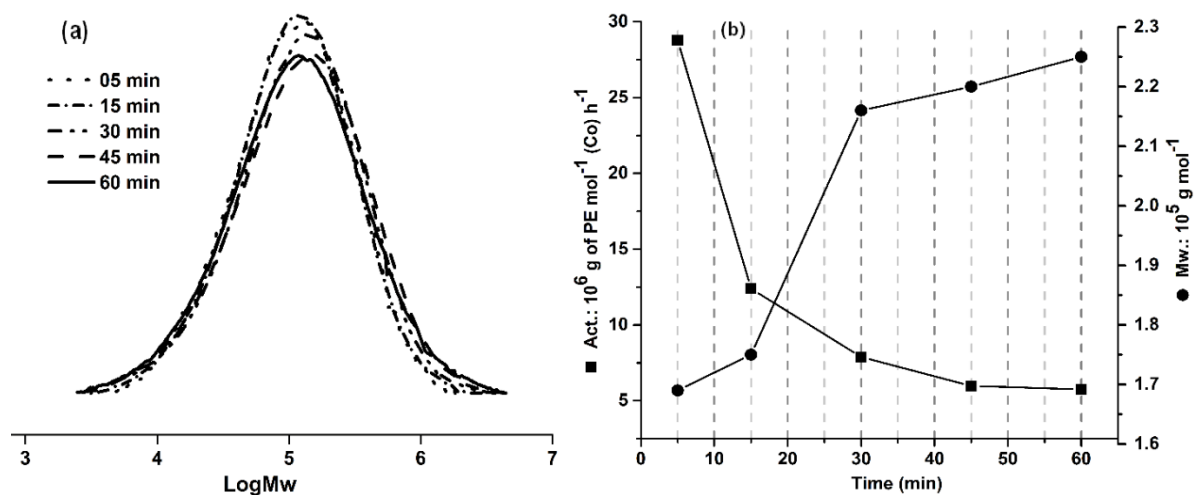

**Figure S8** GPC curves of the obtained polyethylene (a); activity and  $M_w$  as a function of run time (b) for the **Co1**/MMAO system (Table 5, entries 10 and 14 – 17).

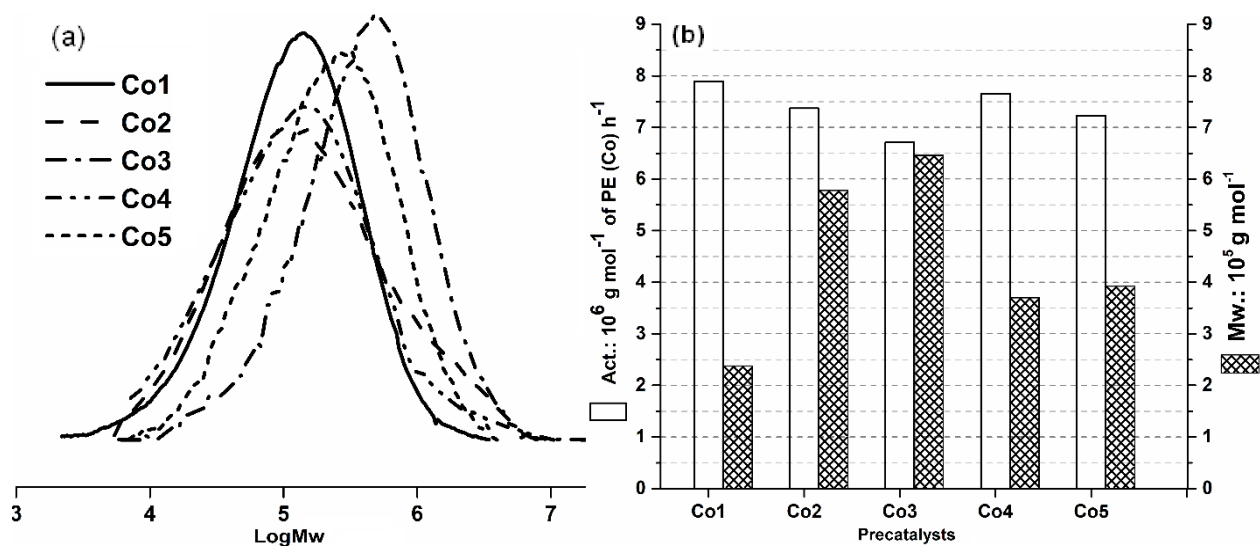

**Figure S9** GPC curves of the obtained polyethylene (a); activity and  $M_w$  for different precatalysts (b) at the optimized reaction conditions with MMAO as cocatalyst (Table 6, entries 1 – 5).

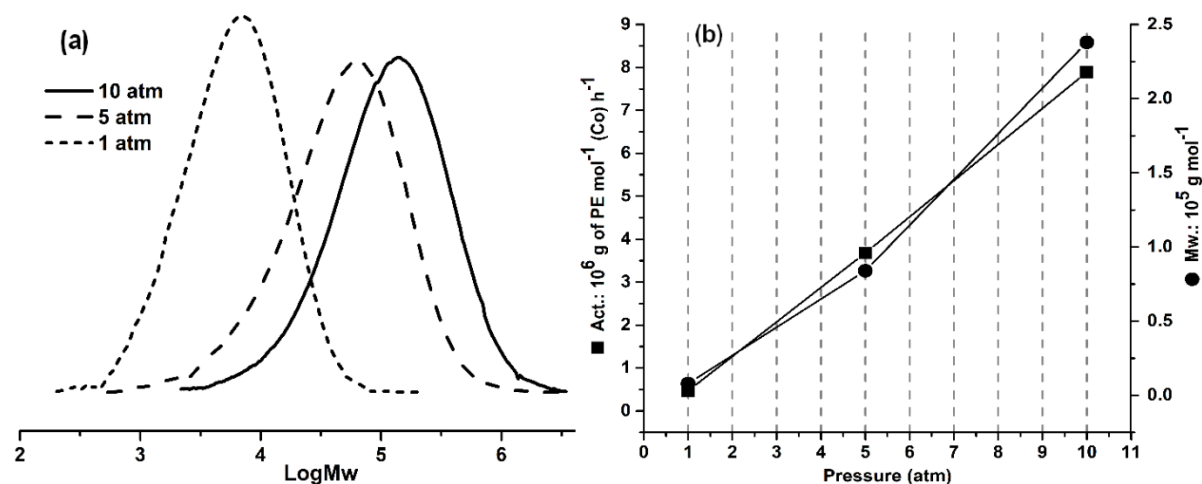

**Figure S10** GPC curves of the obtained polyethylene (a); activity and  $M_w$  as a function of ethylene pressure (b) at the optimized reaction conditions for the **Co1**/MMAO system (Table 5, entries 10, 18 and 19).

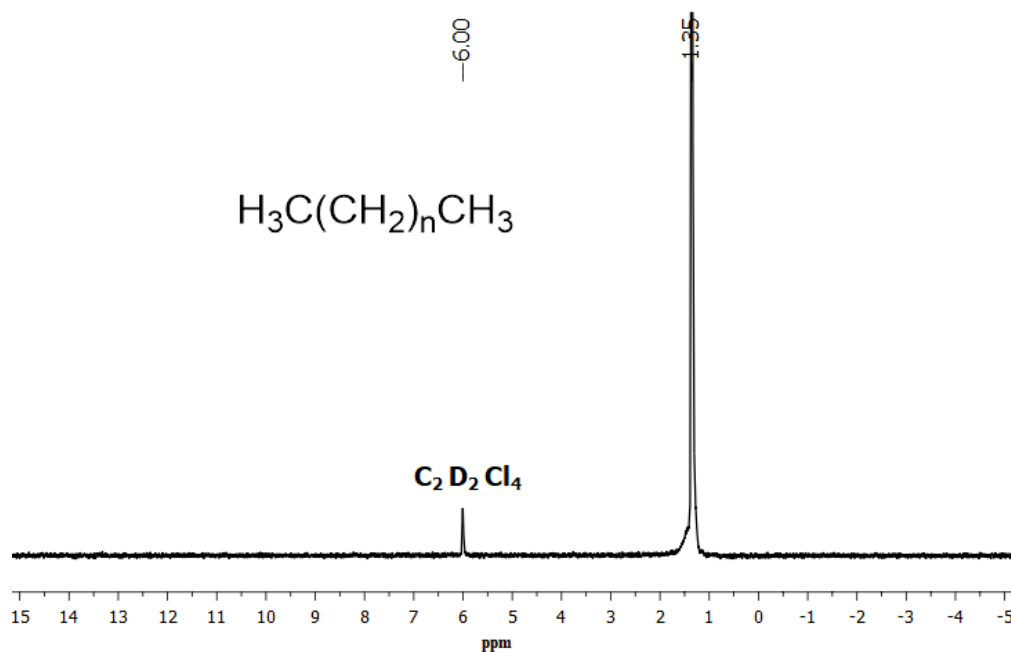

**Figure S11** The  $^1\text{H}$  NMR spectrum of the polyethylene obtained with **Co1**/MMAO (Table 5, entry 10).

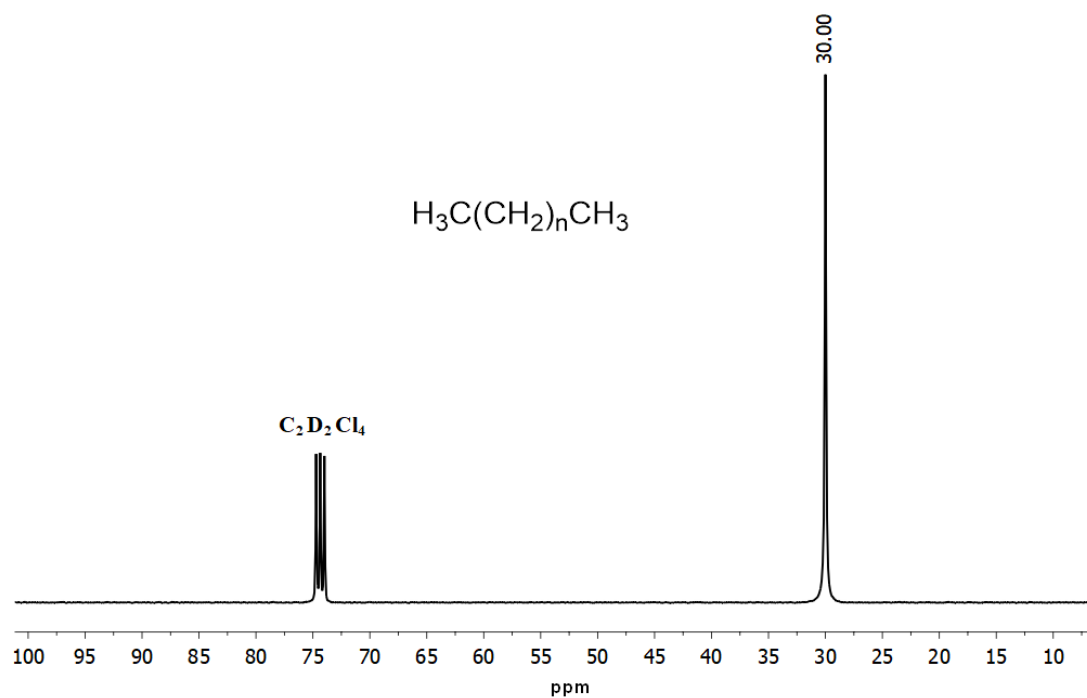

**Figure S12** The  $^{13}\text{C}$  NMR spectrum of the polyethylene obtained with **Co1**/MMAO (Table 5, entry 10).

**Table S1** The selected bond lengths (Å) and angles (°) for the *B* molecules of **Co3** and **Co4**

|                   | <b>Co3</b>        | <b>Co4</b>        |
|-------------------|-------------------|-------------------|
|                   | <i>Molecule B</i> | <i>Molecule B</i> |
| Bond Lengths (Å)  |                   |                   |
| Co(1)–N(1)        | 2.062(4)          | 2.059(7)          |
| Co(1)–N(2)        | 2.216(4)          | 2.177(7)          |
| Co(1)–N(3)        | 2.230(5)          | 2.212(7)          |
| Co(1)–Cl(1)       | 2.2572(16)        | 2.265(2)          |
| Co(1)–Cl(2)       | 2.2957(16)        | 2.298(2)          |
| N(2)–C(10)        | 1.441(7)          | 1.437(10)         |
| N(3)–C(47)        | 1.448(8)          | 1.435(12)         |
| N(1)–C(3)         | 1.349(7)          | 1.335(13)         |
| N(1)–C(7)         | 1.320(7)          | 1.317(12)         |
| N(2)–C(8)         | 1.288(7)          | 1.272(10)         |
| N(3)–C(2)         | 1.295(8)          | 1.289(12)         |
| Bond Angles (°)   |                   |                   |
| N(1)–Co(1)–N(2)   | 73.47(17)         | 74.40(3)          |
| N(1)–Co(1)–N(3)   | 74.46(18)         | 74.40(3)          |
| N(2)–Co(1)–N(3)   | 141.15(17)        | 142.70(3)         |
| N(1)–Co(1)–Cl(1)  | 154.04(13)        | 150.70(2)         |
| N(2)–Co(1)–Cl(1)  | 99.00(12)         | 98.34(17)         |
| N(3)–Co(1)–Cl(1)  | 100.26(15)        | 98.90(2)          |
| N(2)–Co(1)–Cl(2)  | 102.35(12)        | 100.44(18)        |
| N(3)–Co(1)–Cl(2)  | 101.25(15)        | 102.23(19)        |
| Cl(1)–Co(1)–Cl(2) | 111.86(6)         | 114.16(9)         |
| N(1)–Co(1)–Cl(2)  | 94.08(13)         | 95.10(2)          |
| C(10)–N(2)–Co(1)  | 124.20(3)         | 125.40(5)         |
| C(47)–N(3)–Co(1)  | 125.20(4)         | 123.70(6)         |
